# Emergence of Xin Demarcates a Key Innovation in Heart Evolution

Shaun E. Grosskurth, Debashish Bhattacharya, Qinchuan Wang, Jim Jung-Ching Lin\*

Department of Biology, University of Iowa, Iowa City, Iowa, United States of America

## Abstract

The mouse Xin repeat-containing proteins (mXin $\alpha$  and mXin $\beta$ ) localize to the intercalated disc in the heart. mXin $\alpha$  is able to bundle actin filaments and to interact with  $\beta$ -catenin, suggesting a role in linking the actin cytoskeleton to N-cadherin/ $\beta$ -catenin adhesion. mXin $\alpha$ -null mouse hearts display progressively ultrastructural alterations at the intercalated discs, and develop cardiac hypertrophy and cardiomyopathy with conduction defects. The up-regulation of mXin $\beta$  in mXin $\alpha$ -deficient mice suggests a partial compensation for the loss of mXin $\alpha$ . To elucidate the evolutionary relationship between these proteins and to identify the origin of Xin, a phylogenetic analysis was done with 40 vertebrate Xins. Our results show that the ancestral Xin originated prior to the emergence of lamprey and subsequently underwent gene duplication early in the vertebrate lineage. A subsequent teleost-specific genome duplication resulted in most teleosts encoding at least three genes. All Xins contain a highly conserved  $\beta$ -catenin-binding domain within the Xin repeat region. Similar to mouse Xins, chicken, frog and zebrafish Xins also co-localized with  $\beta$ -catenin to structures that appear to be the intercalated disc. A putative DNA-binding domain in the N-terminus of all Xins is strongly conserved, whereas the previously characterized Mena/VASP-binding domain is a derived trait found only in Xins from placental mammals. In the C-terminus, Xins $\alpha$  and Xins $\beta$  are more divergent relative to each other but each isoform from mammals shows a high degree of within-isoform sequence identity. This suggests different but conserved functions for mammalian Xins $\alpha$  and Xins $\beta$ . Interestingly, the origin of Xin ca. 550 million years ago coincides with the genesis of heart chambers with complete endothelial and myocardial layers. We postulate that the emergence of the Xin paralogs and their functional differentiation may have played a key role in the evolutionary development of the heart.

**Citation:** Grosskurth SE, Bhattacharya D, Wang Q, Lin JJ-C (2008) Emergence of Xin Demarcates a Key Innovation in Heart Evolution. PLoS ONE 3(8): e2857. doi:10.1371/journal.pone.0002857

**Editor:** Jean-Nicolas Volff, Ecole Normale Supérieure de Lyon, France

**Received:** April 16, 2008; **Accepted:** July 9, 2008; **Published:** August 6, 2008

**Copyright:** © 2008 Grosskurth et al. This is an open-access article distributed under the terms of the Creative Commons Attribution License, which permits unrestricted use, distribution, and reproduction in any medium, provided the original author and source are credited.

**Funding:** This work was supported by a National Heart, Lung and blood Institute grant HL075015 from the National Institutes of Health to JJ-CL and grants from the National Science Foundation (EF-0625440) and the National Institutes of Health (ES013679) to DB.

**Competing Interests:** The authors have declared that no competing interests exist.

\* E-mail: jim-lin@uiowa.edu

## Introduction

The striated muscle-specific *Xin* gene was first identified in a differential mRNA display screen in chicken embryos and later shown to be necessary for proper cardiac morphogenesis by *Xin* antisense experiments [1,2]. Since then, two genes homologous to chicken *Xin* (*cXin*) have been identified in mammals; *mXin $\alpha$*  and *mXin $\beta$*  (also known as *myomaxin*) in mouse [1,3–5] as well as *hXin $\alpha$*  (also known as *cardiomyopathy associated 1*, *Cmya1*) and *hXin $\beta$*  (also known as *Cmya3*, or *Xin related protein 2*, *XIRP2*) in human [3,6]. The word Xin was derived from the Chinese character for heart, center, or core in pronunciation. Xins localize to the adherens junctions of the intercalated discs of the heart and to the myotendinous junctions in skeletal muscle [1,5–7]. Structurally, the Xin proteins are modular in nature and are defined by the presence of many copies of a 16-amino acid (aa) repeating unit (called the Xin repeat) [1,3,6]. The Xin repeat is known to further define an actin binding domain and a minimum of 3 Xin repeats is required to bind with actin filaments [6,8]. Recently, the full-length mXin $\alpha$  with 15 Xin repeats was shown to bundle actin filaments [9]. In the N-terminal sequence upstream of the Xin repeats, a Mena/VASP-binding domain in hXin $\alpha$  [10] and a putative DNA-binding domain in cXin and mXin [1] have been identified. The C-terminal sequence downstream of the Xin

repeats contains many proline-rich regions and a filamin c-binding region was found in the last 158 aa residues of a minor and largest isoform of hXin $\alpha$  [1,5,10]. Co-localization of mXin $\alpha$  with both  $\beta$ -catenin and N-cadherin is observed throughout mouse embryogenesis and into adulthood [7]. The  $\beta$ -catenin binding domain is mapped to amino acid residues 535 to 636 of mXin $\alpha$ , which overlaps with the actin binding domains; i.e., the Xin repeats [9]. The in vitro actin binding and bundling activities of mXin $\alpha$  are significantly enhanced by the presence of  $\beta$ -catenin [9]. These results together suggest that through direct interaction,  $\beta$ -catenin likely recruits mXin $\alpha$  to the intercalated disc and activates its actin binding and bundling activities. Unlike the *cXin* antisense experiments which result in abnormal cardiac morphogenesis [1], *mXin $\alpha$* -null mice are viable and fertile. However, *mXin $\alpha$* -null mice exhibit numerous cardiac defects such as cardiac hypertrophy, cardiomyopathy, ultrastructural defects and conduction defects [5]. Interestingly, there is an upregulated expression of *mXin $\beta$*  at both message and protein levels in *mXin $\alpha$* -null mouse hearts, suggesting mXin $\beta$  may be partially compensating for the loss of mXin $\alpha$  [5].

In this study, we elucidated the evolutionary history of the Xin-repeat-containing proteins. Furthermore, we identified the origin of a gene encoding Xin prior to the emergence of the Craniata. In all Craniata examined thus far, there are multiple Xin repeat-

containing genes with the exception of lamprey and chicken. Data from this study revealed regions of sequence conservation and divergence among  $Xin\alpha$ s and  $Xin\beta$ s. Consistent with the presence of the  $\beta$ -catenin-binding domain, immunofluorescence studies also revealed co-localization of Xin with  $\beta$ -catenin in chicken, frog and zebrafish hearts. Taken together, these results suggest that the role of Xin in linking actin with  $\beta$ -catenin through the conserved repeat region is one of the novel innovations that aided in the evolution of a true multi-chambered heart.

## Results

### Origin and evolution of the Xin repeats

Searching the genome databases at NCBI, e!Ensembl, Department of Energy Joint Genome Institute (DOE JGI) ([http://genome.jgi-psf.org/euk\\_cur1.html](http://genome.jgi-psf.org/euk_cur1.html)) and Genoscope ([www.cns.fr](http://www.cns.fr)) with the conserved Xin repeat regions of mXin $\alpha$ , mXin $\beta$ , cXin and the zebrafish Xins, showed that the lamprey (*P. marinus*) was the earliest diverging lineage to contain a single copy of the Xin-repeat containing gene. Searches of the Cephalochordate amphioxus (*Branchiostoma floridae*) genome at DOE JGI and the Urochordate tunicate (*Ciona savignyi*) genome at NCBI with the Xin repeat regions from mXin $\alpha$  and lamprey Xin failed to detect a homolog. These results provisionally place the origin of Xin repeat-containing proteins within the chordate lineage after the divergence of vertebrates and Cephalochordates ca. 550 million years ago (Ma) [11].

A sequence alignment of the Xin repeat region from all 40 Xins demonstrated a high degree of conservation of the Xin repeat region (Figure S1). This high degree of conservation can be most readily seen in a schematic alignment of the 31 consensus Xin repeat units in the 40 Xin proteins (Fig. 1). As a conservative estimate, most Xins contain about 26~28 repeat units within this region suggesting that this number may be important for protein function. However, a strong reduction in repeat number was observed in mammalian Xin $\alpha$  proteins, suggesting that this duplicated gene may have acquired a new function in mammals that is correlated with the loss of repeats in the coding region. This idea was tested by applying Tajima's relative rate test for 3 sequences using MEGA4 [12] and the Xin repeat alignment (1,201 aa). For this analysis, we used the lamprey (*P. marinus*) as the outgroup taxon and measured rate differences between the ingroup pairs of Xin $\alpha$  and Xin $\beta$  in human, the western clawed frog *Xenopus tropicalis*, and the opossum *Monodelphis domestica*. This analysis showed that whereas a significant rate difference was not found between the frog Xin sequences ( $P=0.062$ ), both human and opossum Xin $\alpha$  show a significant rate acceleration in comparison to Xin $\beta$  ( $P<0.000$  for both cases).

In order to clarify the phylogenetic history of the Xin repeats, the aligned sequence data was analyzed using maximum likelihood (ML) and Bayesian analyses (Fig. 2) with the lamprey Xin repeat region (*Pm* Xin) as the outgroup. The relationship of the Xin repeats within the ML tree is consistent with the broadly accepted organismal phylogeny; i.e., the teleost and mammal Xins form separate clades. A key feature of the tree is a gene duplication that produced Xin $\alpha$  and Xin $\beta$ . This duplication is consistent with the whole genome duplication event that occurred during early vertebrate evolution when the teleost lineage diverged from lamprey [11,13–15]. In addition, the teleosts have at least three genes encoding Xin which suggests a teleost-specific genome duplication that occurred after their divergence from tetrapods [16,17]. The subsequent loss of the presumed second Xin $\alpha$  in the teleost group and the loss of chicken Xin $\beta$  is explained by persistent loss of anciently duplicated genes in both the teleost and

avian lineages [13,18]. Furthermore, the presence of a zebrafish gene duplication for one of the genes encoding Xin $\beta$  (*Dr* Xin $\beta$  and *Dr* Xin $\beta$ 19) is congruent with the finding that the zebrafish genome has undergone partial genome expansion about 140 Ma [13] resulting in the accumulation of duplicated genes after the divergence of zebrafish from *Tetraodon*.

Because no lineage prior to the lamprey apparently encodes a Xin repeat containing protein, the sequences of mXin $\alpha$ , mXin $\beta$  and lamprey Xin were used as queries in BLASTP searches to identify proteins that may share a common ancestry with Xin. The searches only had hits within C-terminal region of the Xins and the proteins identified with E values ranging from  $3e-12$  to 0.002 could be classified into one of the following groups: 1) cytoskeletal or actin interacting proteins, 2) transcription factor or nucleotide binding proteins, 3) proteins involved with G protein signaling and 4) unknown function including proline-rich protein 2 and SH3 binding protein CR16. Although these results only suggest that Xin proteins share ancestry with these proteins, the results do indicate that Xin may be derived from a protein(s) that interacted with the cytoskeleton and possibly nucleic acids.

### Conserved $\beta$ -catenin binding domain within the Xin repeat region

The  $\beta$ -catenin-binding domain has been mapped to amino acid residues 535–636 of mXin $\alpha$ , which overlaps with the known actin binding domains composed of Xin repeats (XR17~XR19) [1,5,7,9]. To identify whether the  $\beta$ -catenin-binding domain is conserved in all Xins or alternatively is a derived trait specific to mXin $\alpha$ , the homologous region to the mXin $\alpha$ 's  $\beta$ -catenin binding domain for the other 39 Xins were identified and aligned (Figure S2). There is significant sequence identity between various Xins within the  $\beta$ -catenin binding domain (from 37.1% for hXin $\beta$  or mXin $\beta$  to 81.9% for hXin $\alpha$  when compared to mXin $\alpha$ ) (Fig. 3). The  $\beta$ -catenin binding domains of human, mouse, chicken, zebrafish, and lamprey Xin were further analyzed with PSIPRED to examine whether the secondary structure is conserved. As shown in Fig. 3, the predicted secondary structure consists of a conserved  $\beta$ -sheet (arrow)- $\alpha$ -helix (loop) repeating motif throughout this region for all Xins. Where as the armadillo repeats of  $\beta$ -catenin and other armadillo-containing proteins form a highly elongated structure with a positively charged groove [19,20], the  $\beta$ -catenin binding domains found on various known  $\beta$ -catenin-interacting proteins such as N-cadherin, APC, and Tcf usually form an extended peptide with an acidic isoelectric point (pI) [21,22]. The charge interaction appears to play an important role for the binding. The predicted pI for the  $\beta$ -catenin binding domain for all Xins is also acidic with a pI ranging from 4.5–5.9 for the Xin $\alpha$ s and 4.2–5.8 for the Xin $\beta$ s, suggesting that this region is a good candidate for interactions with armadillo repeat-containing proteins.

Immunofluorescence microscopy was carried out on frozen sections of chicken, frog (*Xenopus laevis*) and zebrafish (*Danio rerio*) hearts to determine whether Xin co-localization with  $\beta$ -catenin at the intercalated discs is evolutionarily conserved. To determine the antibody specificity, Western blot analysis was first performed on protein extracts prepared from mouse, turkey, chicken, frog, and zebrafish hearts (Fig. 4). As previously reported [5], U1013 anti-mXin antibody recognizes a major band mXin $\alpha$  (155 kDa) and its splicing variant mXin $\alpha$ -a (250 kDa) as well as a 340 kDa mXin $\beta$  band in mouse heart extract (Fig. 4). Similarly, the U1013 antibody recognizes a major band Xin $\alpha$  of size 217 kDa (\* in Fig. 4), its splicing variant of size 282~295 kDa (\*\* in Fig. 4) and some degraded fragments (160~198 kDa) from turkey, chicken, frog and zebrafish heart extracts. In addition, the antibody cross-

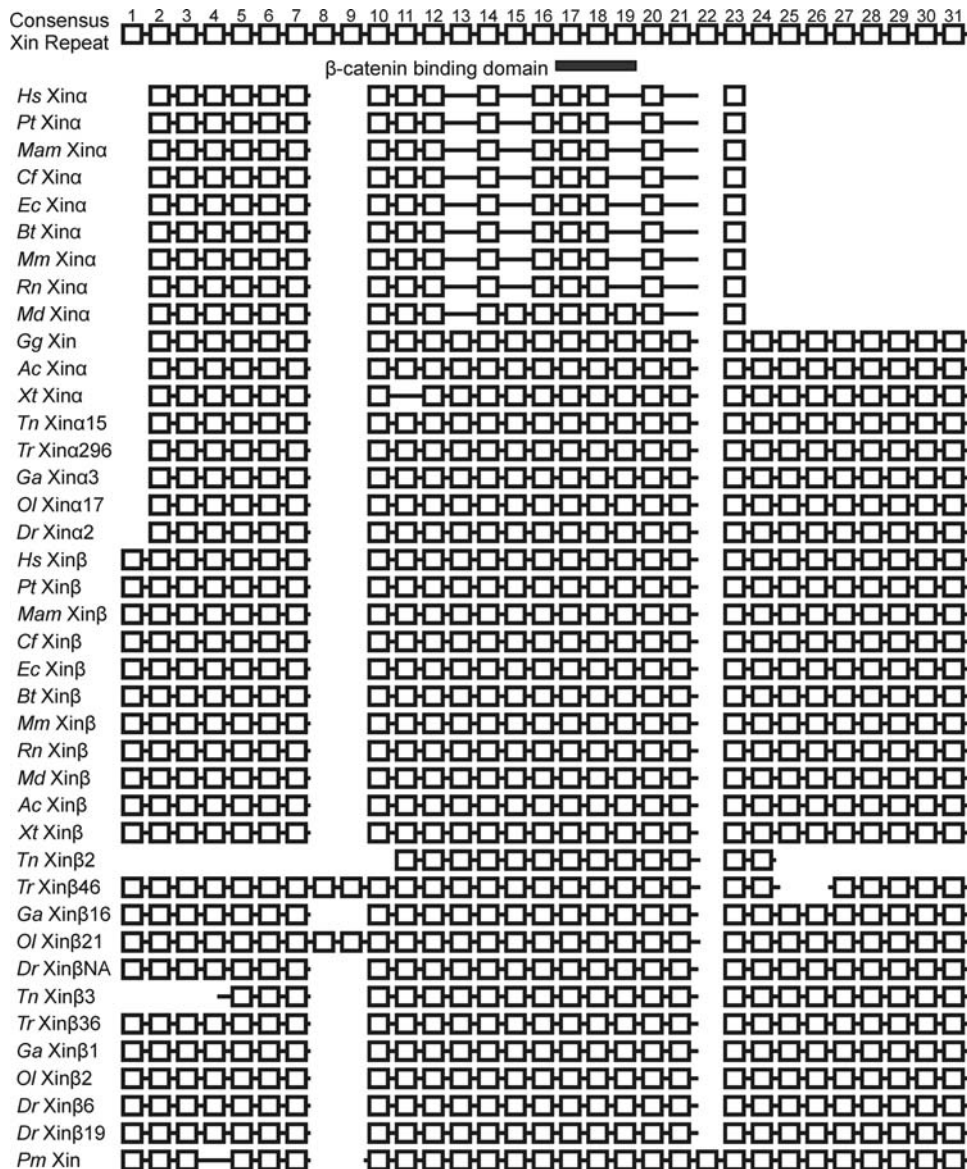

**Figure 1. Schematic diagram of the Xin repeat alignment.** The conserved Xin repeat unit is represented as a square for the 40 Xin proteins and this conserved Xin repeat region (from aa#89–742 of mXin $\alpha$  and aa#308–1306 of mXin $\beta$ ) was used as proxies for the complete Xin sequences in this diagram [3]. The consensus Xin repeat region is comprised of 31 Xin repeat units. Large Xin repeat sequence gaps are represented as spaces in the alignment, while solid lines represent amino acids not part of a Xin repeat. The  $\beta$ -catenin binding domain indicated by a grey rectangle is located from the 17<sup>th</sup> to the 19<sup>th</sup> Xin repeat within the consensus diagram [9]. Species: *Hs*, *Homo sapien* (human); *Pt*, *Pan troglodytes* (chimpanzee); *Mam*, *Macaca mulatta* (rhesus monkey); *Cf*, *Canis lupus familiaris* (dog); *Ec*, *Equus caballus* (horse); *Bt*, *Bos taurus* (cow); *Mm*, *Mus musculus* (mouse); *Rn*, *Rattus norvegicus* (rat); *Md*, *Monodelphis domestica* (opossum); *Gg*, *Gallus gallus* (chicken); *Ac*, *Anolis carolinensis* (green anole); *Xt*, *Xenopus tropicalis* (western clawed frog); *Tn*, *Tetraodon nigroviridis* (freshwater pufferfish); *Tr*, *Takifugu rubripes* (Japanese pufferfish); *Ga*, *Gasterosteus aculeatus* (stickleback); *Ol*, *Oryzias latipes* (Japanese medaka); *Dr*, *Danio rerio* (zebrafish); *Pm*, *Petromyzon marinus* (lamprey).  
doi:10.1371/journal.pone.0002857.g001

reacts with a minor band of size 335 kDa that appears to be Xin $\beta$  from frog and zebrafish heart extracts but not from turkey and chicken heart extracts (\*\*\*) in Fig. 4). As previously demonstrated in the mouse heart [7], double-label immunofluorescence microscopy also revealed a high degree of colocalization of Xin with  $\beta$ -catenin to the structure that appears to be intercalated discs in chicken, frog, and zebrafish hearts (Fig. 5). Unlike that seen in the mouse heart section, the fluorescence intensity of Xin at each location in chicken, frog and zebrafish heart sections was not totally equal to that of  $\beta$ -catenin. Thus, only portion of colocalizations in merged images shows yellow color (Fig. 5D, H

and L); however, the overall staining patterns for Xin and  $\beta$ -catenin are very similar. Specificity for the anti-Xin antibody to structures of the intercalated disc was demonstrated by the lack of colocalization of Xin with a thin filament protein, cardiac troponinT, in the chicken (data not shown), frog (data not shown) and zebrafish (Fig. 6B and C) hearts at higher magnification. A high degree of colocalization of Xin with N-cadherin, a known  $\beta$ -catenin-binding protein, to the intercalated disc was also detected in frog (data not shown) and chicken heart sections (Fig. 6G–I). Certain colocalization of Xin with plakoglobin, other intercalated disc marker found in both adherens junctions and desmosomes, to

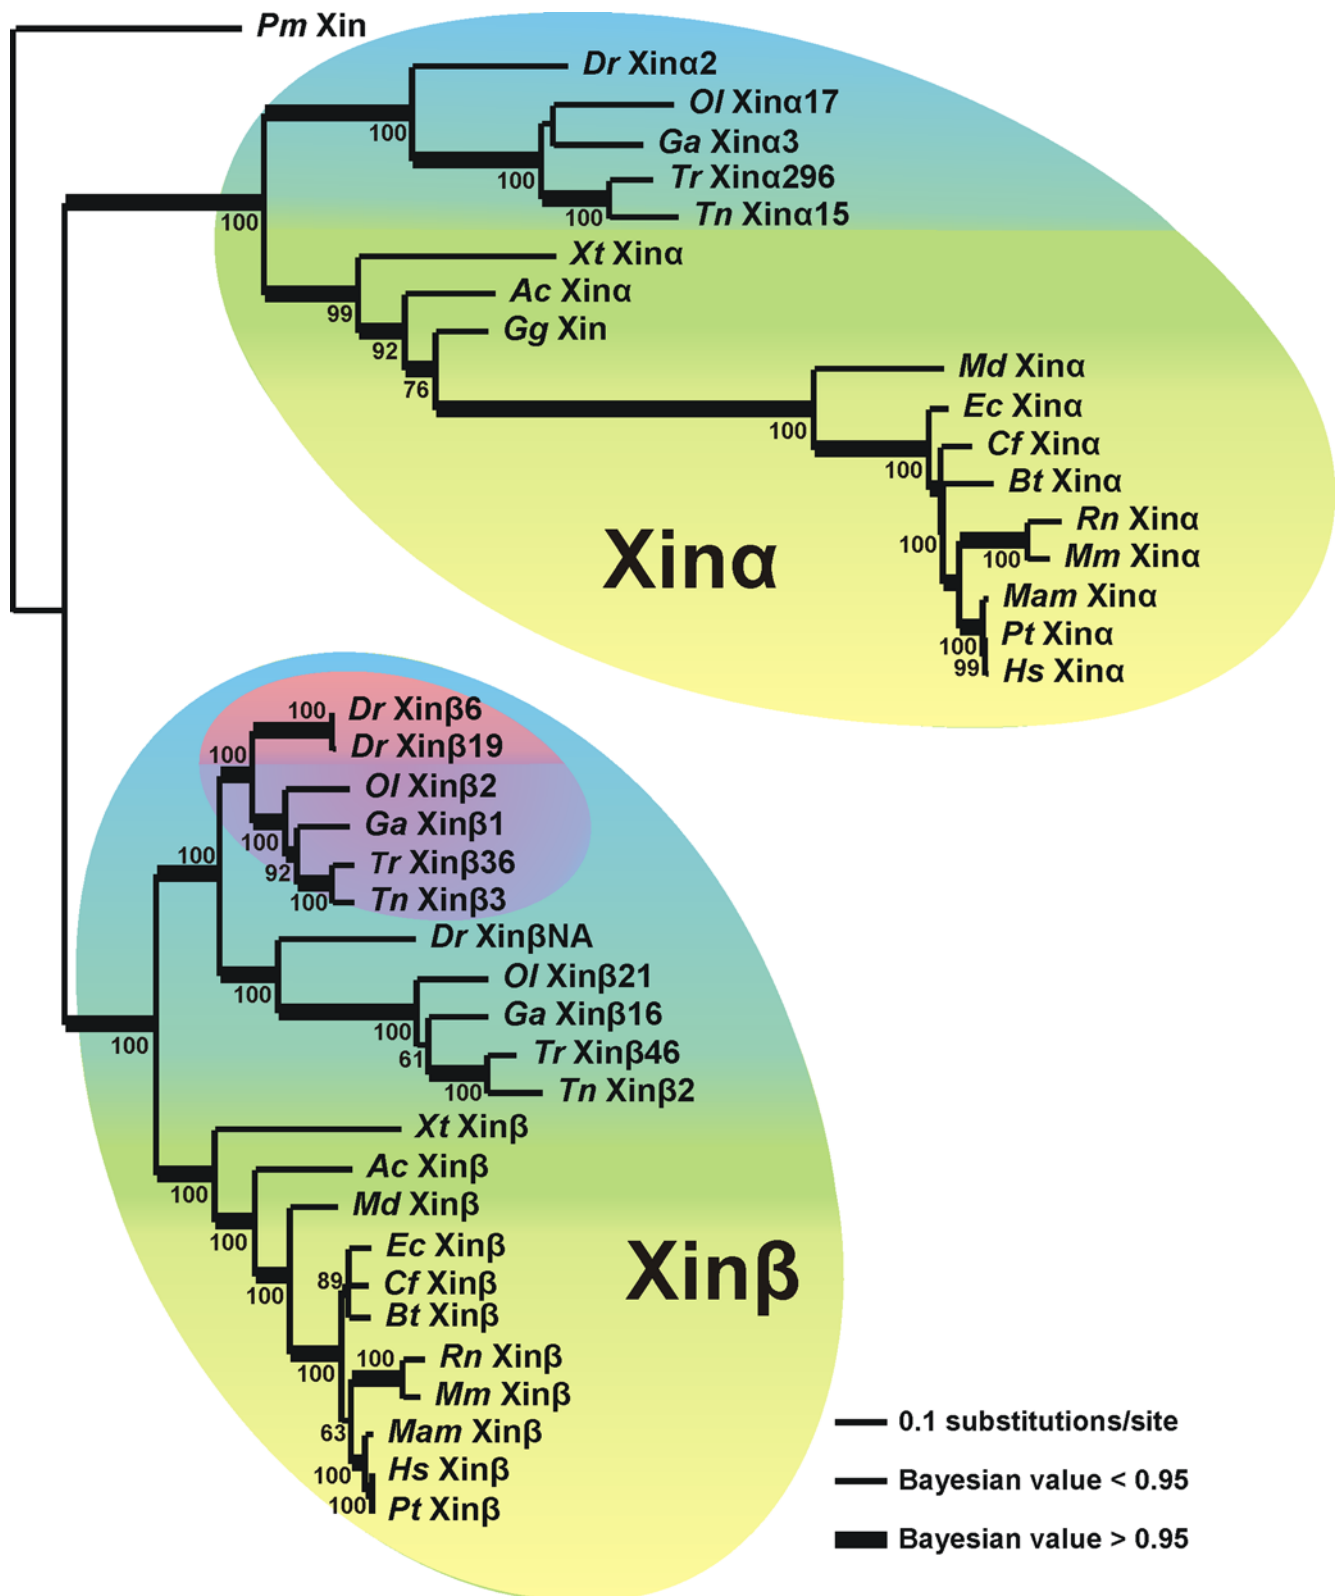

**Figure 2. Evolutionary relationships of the Xin repeat region.** The CLUSTAL W multiple sequence alignment [42] shown in Figure S1 was analyzed in maximum likelihood (ML) and Bayesian analyses. Bootstrap values are shown near each node for the ML analysis. Bayesian values greater than 0.95 are represented with thicker lines. Lamprey Xin repeat region (*Pm* Xin) was used as the outgroup. The tree replicates the phylogeny of these taxa, with the mammal, other land vertebrates and teleost (bony fish) phylum-level groups highlighted in yellow, green and blue respectively. The original gene duplication that produced Xin $\alpha$  and Xin $\beta$  proteins is illustrated by their monophyletic groupings that are respectively labeled. The additional multiplication of Xin $\beta$  in teleosts is highlighted in purple and the additional Xin $\beta$  gene duplication in zebrafish is highlighted in pink. Scale bar: 0.1 substitutions per site.

doi:10.1371/journal.pone.0002857.g002

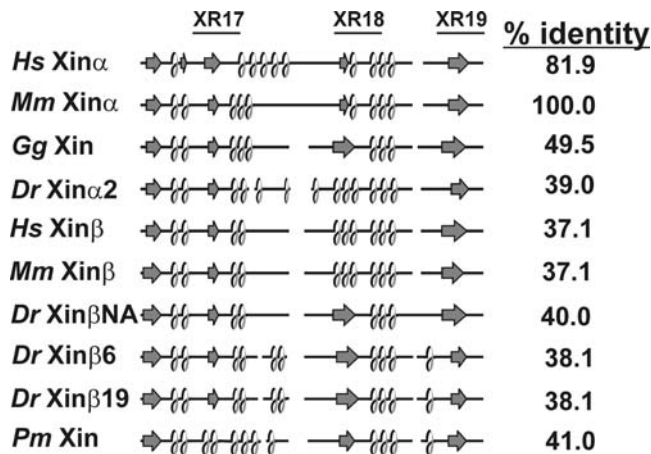

**Figure 3. The conserved secondary structure of the  $\beta$ -catenin binding domain in Xin proteins.** The  $\beta$ -catenin binding domain was previously mapped to aa#535–636 of mXin $\alpha$  [9] and the multiple sequence alignment of this domain from all Xins was shown in Figure S2. The secondary structure of the  $\beta$ -catenin binding domain of Xin proteins, based on predictions by PSIPRED [48], is schematically shown;  $\alpha$  helices are indicated with loops,  $\beta$ -sheets (strands) are indicated with arrows and all other features are indicated with straight solid lines. Positions of the 17<sup>th</sup>–19<sup>th</sup> Xin repeats (XR) are provided with their consensus number and are indicated by a solid line. doi:10.1371/journal.pone.0002857.g003

the intercalated disc could be observed in zebrafish heart section (Fig. 6D–F). Unfortunately, we could not determine the colocalization of Xin with gap junction components, since the anti-connexin43 antibody that we used did not cross react with connexin 43 from chicken, frog and zebrafish hearts. This colocalization of Xin with  $\beta$ -catenin across evolutionarily distantly related lineages further supports the existence of a highly conserved  $\beta$ -catenin-binding domain.

### Evolution of other binding domains in Xin proteins

Other than the Xin repeat region and the  $\beta$ -catenin binding domain, there is a previously characterized Mena/VASP-binding domain [10] and a putative DNA binding domain [1] in the N-terminal region upstream of the Xin repeats. The N-terminal regions were aligned and then examined for the homologous sequences for these domains. Most (36/40) of the Xins share significant identity in the putative DNA binding domain and its immediate upstream region (Figure S3). The Mena/VASP-binding domain (EDLPLPPPALED) in hXin $\alpha$  was previously shown to directly interact with the EVH1 domain of Mena and VASP family proteins, actin cytoskeleton modulators [10]. Interestingly, the deletion of two acidic residues from either the N- or C-terminus of this domain greatly reduced or completely abolished the binding ability, respectively. Based on these criteria and sequence alignment, only Xin $\alpha$  proteins from the placental mammals but not from opossum (*Md* Xin $\alpha$ ) contain this consensus Mena/VASP-binding domain (yellow box in Fig. 7). In the Xin $\beta$  proteins of the placental mammals, there is a proline-rich region similar to that in the Mena/VASP-binding domain; however, absence of the C-terminal two acidic residues may suggest a lack of function. Therefore, the Mena/VASP-binding domain appears to be a novel feature of Xin $\alpha$  proteins in placental mammals. It should be noted that the sequences downstream of this Mena/VASP-binding domain of Xin $\alpha$  are also highly similar (light blue and green boxes in Fig. 7), although there is currently no assigned function for this region.

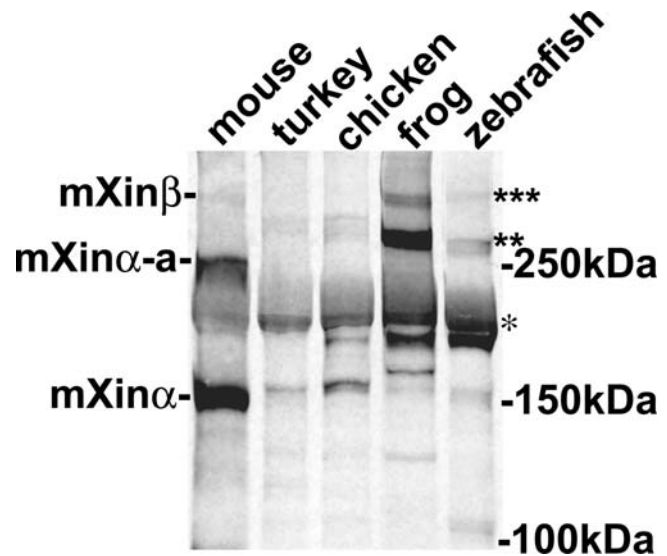

**Figure 4. Western blot analysis of protein extracts prepared from mouse, turkey, chicken, frog and zebrafish hearts with polyclonal U1013 anti-Xin antibody.** As previously reported [5], the U1013 antibody generated against the N-terminal fragment of mXin $\alpha$  including the Xin repeat region specifically reacts with mXin $\alpha$  (155 kDa), mXin $\alpha$ -a (250 kDa) and mXin $\beta$  (~340 kDa) from mouse heart. Similarly, this antibody recognizes a 217 kDa band (indicated by \*), and 280–295 kDa bands (indicated by \*\*) from turkey, chicken, frog and zebrafish heart extracts. These bands may represent Xin $\alpha$  and its splicing variants Xin $\alpha$ -a. Many degraded fragments were also detected by this antibody. In frog and zebrafish but not turkey and chicken heart extracts, this antibody also reacts with a 335 kDa band (indicated by \*\*\*), which may represent Xin $\beta$  isoform. doi:10.1371/journal.pone.0002857.g004

The variable C-terminal regions immediately downstream of the Xin repeats were aligned and examined for the conserved regions (Figure S4), the proline-rich regions [1] (Figure S5) and the previously characterized filamin c-binding region [10] (Figure S6). Overall, these alignments revealed that Xin $\alpha$ s and Xin $\beta$ s are highly diverged at their C-termini, suggesting that each gene may play a unique function in the striated muscle.

### The origin of Xin coincides with the genesis of heart chamber

A phylogenetic tree was adapted from previous work [23,24] to illustrate the evolutionary relationships of various vertebrates and their Xin proteins over a broad evolutionary time-scale (Fig. 8). Using this phylogenetic framework, the origin of the Xin repeat-containing proteins is placed roughly 550 Ma prior to the emergence of lamprey and between the two rounds (1R and 2R in Fig. 8) of vertebrate genome duplication [11,15]. This assignment of the origin of Xin is consistent with the apparent absence of Xin in either the Urochordate tunicate (*Cs*, *Ciona savignyi*) or the Cephalochordate amphioxus (*Bf*, *Branchiostoma floridae*). BLAST searches using genome data from *Saccharomyces cerevisiae* (baker's yeast), *Candida albicans* (fungal yeast pathogen), *Arabidopsis thaliana* (mouse-ear cress plant), *Dictyostelium discoideum* (amoeba), *Caenorhabditis elegans* (worm), *Anopheles gambiae* (mosquito) and *Drosophila melanogaster* (fruit fly) also failed to detect Xin in these more distantly related taxa. Our hypothesis for the origin of Xin is also supported by the finding of a single gene encoding Xin in lamprey. Uniquely, *Pm* Xin lacks XR4 but has XR22, which likely represents the original Xin repeat organization and number



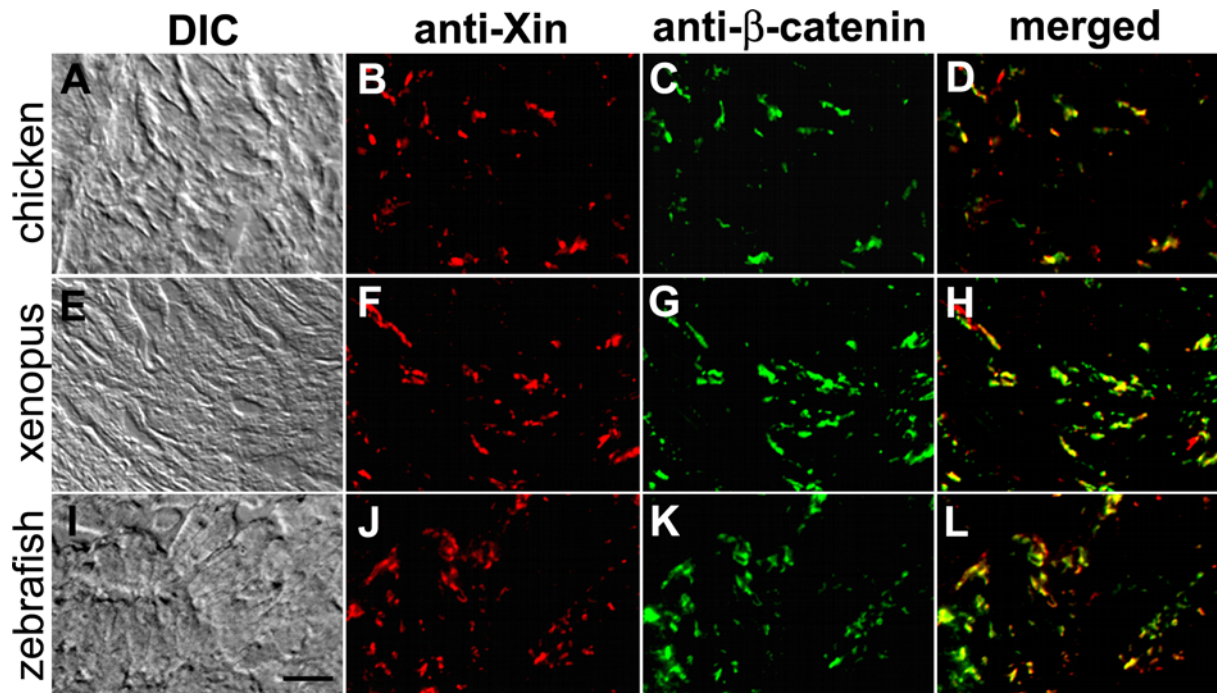

**Figure 5. Co-localization of Xin proteins and  $\beta$ -catenin in chicken, frog and zebrafish hearts.** Double-label indirect immunofluorescence microscopy was performed on frozen sections of chicken (A–D), frog (E–H) and zebrafish (I–L) hearts with mouse monoclonal anti- $\beta$ -catenin (C, G, K) and rabbit polyclonal U1013 anti-mXin (B, F, J) antibodies, and subsequently with a mixture of rhodamine-conjugated goat anti-rabbit IgG and fluorescein-conjugated goat anti-mouse IgG. Merged images (D, H, L) indicate co-localization of the two proteins. The differential interference-contrast (DIC) images correspond to the fluorescent images shown in respectively. Scale bar: 10  $\mu$ m. doi:10.1371/journal.pone.0002857.g005

(Fig. 1). Thereafter, all Xins except *Tn* Xin $\beta$ 2 and *Tn* Xin $\beta$ 3 gained XR4 and deleted XR22.

Given this interesting and clear pattern of gene and genome duplication in vertebrates it is tempting to speculate how Xin proteins may have played a role in the evolution of the heart. The tunicate and amphioxus models provide an important comparative tool for understanding pre-Xin heart evolution. In the tunicate, the heart is a tubular structure that does not coordinate directional blood flow and the heart tube is composed of a single layer of myoepithelium surrounded by a single layer of pericardial coelom [25,26]. In amphioxus, the heart consists of several contractile vessels composed of a myoepithelial layer which are not continuously lined with an endothelium [27,28]. However, after the origin of Xin many novel features are observed in the heart. In the lamprey, these include a S-shaped heart consisting of four regions: a sinus venosus, a contracting atrium, a contracting ventricle and conus arteriosus [29]; the presence of valves to promote unidirectional blood flow; the origin of true heart chambers (atrium and ventricle) with both endothelial and myocardial layers [30] (Fig. 8).

The heart in zebrafish and lamprey are similar in organization and consist of two chambers with complete endothelial and myocardial layers which are also hallmark features of the heart in all later-diverging taxa [30,31]. The presence of one Xin $\alpha$  and multiple copies of Xin $\beta$  in teleost is rather perplexing because one would assume that one *Xin* gene which is sufficient in lamprey would also be sufficient in the teleost lineage. However, vertebrates have evolved a nerve system to modulate cardiac activity in a sophisticated fashion [32]. These activities include heart rates, contractile force, action potential and conduction velocity. In this regard, it is known that both vagus nerve and sympathetic nerve fibers innervate the mammalian and teleost hearts, whereas only

the vagus nerve functions in the adult lamprey heart [33,34]. Therefore, multiple *Xin* genes may be required for responding to different cardiac outputs in different animals and/or in different regions of the heart.

In tetrapods, two unique events occurred: 1) in the avian lineage there is a loss of Xin $\beta$ , and 2) in the mammalian lineage, Xin $\alpha$  contains a reduced number of Xin repeat units with 17 repeats in marsupials and 15 in placental mammals. Whereas there are dramatic morphological changes in the organization of the heart from a two chambered heart with an atrium and a ventricle in lamprey, to a three chambered heart with two atria and a ventricle in the amphibian and reptile, and finally to a four chambered heart with two atria and two ventricles in the avian and mammal (Fig. 8); the heart chambers still consist of an endothelial layer and a myocardial layer [35]. The morphological changes in the heart cannot be a plausible explanation for the loss of Xin $\beta$  in the avian lineage or the loss of repeats in the mammal Xin $\alpha$ . It is likely that physiological and functional changes in the heart are responsible for these evolutionary adaptations.

## Discussion

Xin originated prior to the emergence of lamprey roughly 550 Ma after which the vertebrate lineage experienced a whole genome duplication [11,13–15] resulting in the appearance of Xin $\alpha$  and Xin $\beta$ . Prior to the teleost lineage, a teleost-specific whole genome duplication [16,17] resulted in the duplication of the genes encoding Xin $\alpha$  and Xin $\beta$ . However, all of the teleost species examined have lost one of the genes encoding Xin $\alpha$ , suggesting that Xin $\alpha$  loss occurred prior to the teleost radiation. Interestingly, zebrafish has 3 genes encoding Xin $\beta$  indicating that a recent single gene duplication of one of their *Xin* $\beta$  genes derived the genes

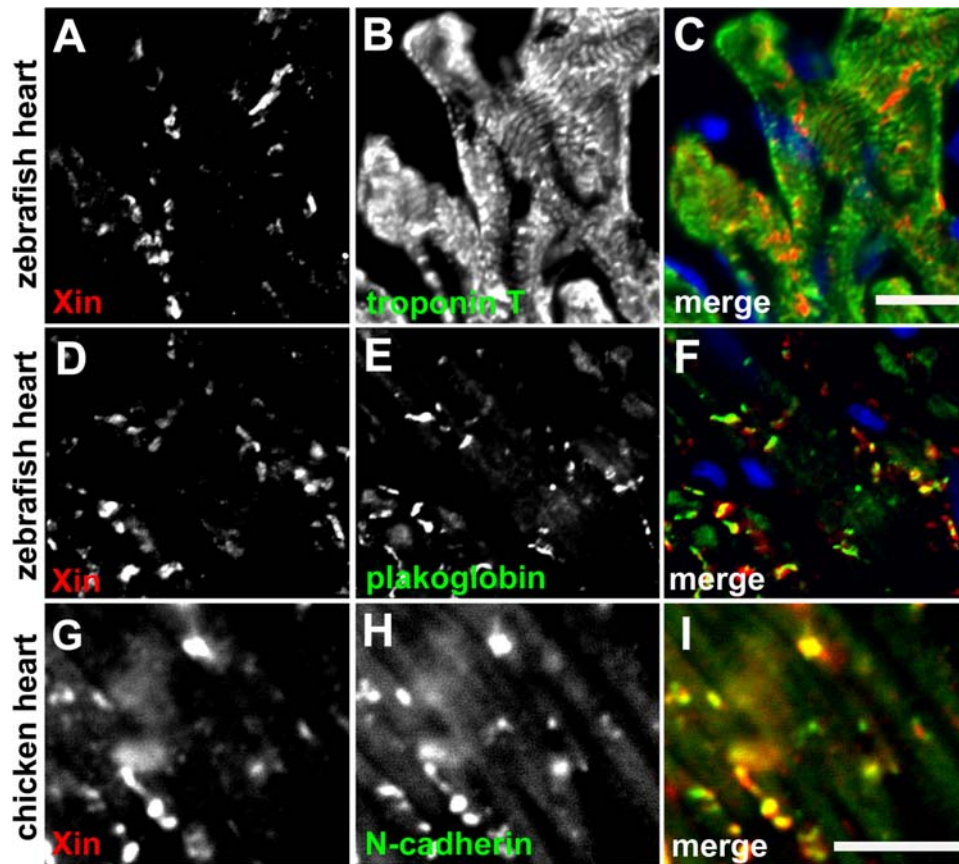

**Figure 6. Immunofluorescence microscopy of zebrafish and chicken heart sections.** (A–F) Double-label indirect immunofluorescence was performed on frozen sections of zebrafish heart with monoclonal anti-troponin T or anti-plakoglobin (green, visualized by fluorescein-conjugated 2<sup>nd</sup> antibody) and polyclonal anti-mXin (red, visualized by rhodamine-conjugated 2<sup>nd</sup> antibody). Before mounting, the sections were treated with DAPI to stain nuclei (blue). Scale bar: 10  $\mu$ m. (G–I) Double-label indirect immunofluorescence was performed on chicken heart section with monoclonal anti-N-cadherin (green) and polyclonal anti-mXin antibody (red). Scale bar: 10  $\mu$ m.  
doi:10.1371/journal.pone.0002857.g006

encoding Xin $\beta$ 6 and Xin $\beta$ 19. Most of the tetrapods which include the amphibians, reptiles, and mammals have two *Xin* genes. However, the avian species (chicken and probably turkey) do not have a gene encoding Xin $\beta$ . BLAST searches of the zebra finch (*Taeniopygia guttata*) genome at NCBI with the chicken *Xin* sequence did not return any significant hits, which may indicate incomplete annotation of this genome. Thus, whether the *Xin* $\beta$  gene was lost in only chicken or a larger subset of avian species remains unclear.

The ancestral lamprey *Xin* repeat region contains 28 *Xin* repeats that are highly conserved in most other vertebrate *Xins* (Fig. 1). However, there are two instances in which *Xin* proteins deviate from this number: 1) Xin $\beta$  in the freshwater pufferfish and 2) Xin $\alpha$  in the mammalian lineage. The freshwater pufferfish Xin $\beta$ 2 and Xin $\beta$ 3 contain 13 and 24 *Xin* repeat units, respectively. A possible explanation for the fewer repeats could be a consequence of the reduced genome size within this species since the freshwater pufferfish genome has been completely annotated [16] and no other teleost *Xin* repeat regions contain fewer than the consensus number of repeats. The marsupial and all placental mammal Xin $\alpha$  proteins contain 17 and 15 *Xin* repeats, respectively. This strongly suggests that there was selective pressure within the mammalian lineage that resulted in the reduction of *Xin* repeats. The number of *Xin* repeats appears to be important for the function of the *Xin*

proteins for a variety of reasons. Three *Xin* repeats are sufficient for binding actin [6,8] and six repeats are sufficient for binding and cross-linking actin filaments [6,8]. Recently, the full-length mouse Xin $\alpha$  with fifteen *Xin* repeats has been shown to bundle actin filaments [9].

Both the  $\beta$ -catenin-binding domain and putative DNA binding domain appear to be ancestral domains found in all Xin $\alpha$ s and Xin $\beta$ s. The secondary structure of the  $\beta$ -catenin binding domain is evolutionarily conserved. More importantly, there is strong colocalization of *Xin* with known intercalated disc components, such as  $\beta$ -catenin, N-cadherin and plakoglobin in the mouse, chicken, frog and fish hearts. This suggests that *Xin* localization to the intercalated disc in the heart is evolutionarily conserved and may also indicate that the direct interaction between the two proteins is also conserved [9]. Unfortunately, the function of the highly conserved, putative DNA binding domain is unknown. In contrast, the Mena/VASP-binding domain is a derived trait found only in placental mammal Xin $\alpha$ s. In the C-terminus downstream of the *Xin* repeats, there exist many conserved regions among either Xin $\alpha$ s or Xin $\beta$ s but divergent between Xin $\alpha$  and Xin $\beta$  even within the same species. For example, the proline-rich regions are strongly conserved in most *Xins* but do not appear to be homologous regions when comparing the Xin $\alpha$  proteins to the Xin $\beta$  proteins or when comparing the fish *Xins* to the tetrapod

### Mena/VASP-binding domain

|                            |                                                                                                     |
|----------------------------|-----------------------------------------------------------------------------------------------------|
| <i>Hs</i> Xin $\alpha$     | TAEDLPL P P P P A . . . . . LEDLPL P P P K E S F S K F H : 46                                       |
| <i>Pt</i> Xin $\alpha$     | TAEDLPL P P P P A . . . . . LEDLPL P P P K E S F S K F H : 46                                       |
| <i>Mam</i> Xin $\alpha$    | TAEDLPL P P P P A . . . . . LDDLPL P P P K E S F S K F H : 46                                       |
| <i>Cf</i> Xin $\alpha$     | AAEDLPL P P P P A . . . . . LDDLPL P P P K E S F S K F H : 46                                       |
| <i>Ec</i> Xin $\alpha$     | TAEDLPL P P P P A . . . . . LEDL P P P P P K E S F S K F H : 46                                     |
| <i>Bt</i> Xin $\alpha$     | ATEDLPL P P P P A . . . . . LEDL P P P P P K E S F S K F H : 46                                     |
| <i>Mm</i> Xin $\alpha$     | TEEDLSL P H P S A . . . . . P E G L P P P P P K E T F S K F Q : 46                                  |
| <i>Rn</i> Xin $\alpha$     | TGEDLPL P P P P A . . . . . L E G L P P P P P K E S F S K F Q : 46                                  |
| <i>Md</i> Xin $\alpha$     | SAMTF P K P G E D A . . . . . P P L P P P K E A F S K F Y : 35                                      |
| <i>Gg</i> Xin              | MEDDL P P P P I P D S I Q V I A P A S Q D P N . . . P L P V P P P K Q A F S K F Y : 54              |
| <i>Ac</i> Xin $\alpha$     | IDENL P P P P P P S Q D S A P G A A S I A R S Q N S P L P P P P P K E T F S K F Y : 61              |
| <i>Tn</i> Xin $\alpha$ 15  | DEEDL P P P P P L V P P R P L D H E G P G S . . . S T P P P P P P K E T F A T F C : 55              |
| <i>Tr</i> Xin $\alpha$ 296 | DEEDL P P P P P L V P P R P L D Y E G P E L . . . S T P P P P P P K E T F T A F C : 55              |
| <i>Dr</i> Xin $\alpha$ 2   | GDEDF P P P P P L . P R P Q V L E S L Q K D L S Q N F L V P P P K E T F S E I Y : 58                |
| <i>Rm</i> Xin              | GSMTL P P P P S D L L H G S . . . . . L D F L P P P P P A P Q S S K S R T P A R T : 76              |
|                            |                                                                                                     |
| <i>Hs</i> Xin $\beta$      | GMTEEF P P P P . P D V L Q . . T S V D V T A F S Q S P E L P S P P R R L P V . . P K D V Y S : 490  |
| <i>Pt</i> Xin $\beta$      | GMTEEF P P P P . P D V L Q . . T S V D V T A F S Q S P E L P S P P R R L P V . . P K D V Y S : 421  |
| <i>Mam</i> Xin $\beta$     | GMTEEF P P P P . P D V L Q . . T S V D A T A F S Q S P E L P S P P R R L P V . . P K D V Y S : 496  |
| <i>Cf</i> Xin $\beta$      | GKTEEF P P P P . P D I F Q . . T F V D V T A F S Q S P E C P N P P R I P L V . . P K E L Y S : 309  |
| <i>Ec</i> Xin $\beta$      | RKTEEF P P P Q . P D I L Q . . T P I D V T A F S Q S P E V P S P P R I P P V . . P K E L Y S : 261  |
| <i>Bt</i> Xin $\beta$      | EKTEEF P P P P . P D M L Q . . P F V D V T A F S Q S P E L E N P P R K P P V . . P K E L Y S : 309  |
| <i>Mm</i> Xin $\beta$      | GKMEEF P P P P . P D V C Q . . T E M D V T A F S Q S P E F P S P P R R L E M . . P K D L Y S : 261  |
| <i>Rn</i> Xin $\beta$      | GKMEEF P P P P . P D V F Q . . T E M D V T A F S Q S P E F P S P P R R L E M . . P R D V Y S : 259  |
| <i>Md</i> Xin $\beta$      | GKTED F L P P P . S K V V P . . T L E D V T A F S Q S P E C P K P P G K C P I . . P K D L Y S : 307 |
| <i>Ac</i> Xin $\beta$      | GSTEEL P P P P S P D L L Q . . A P S E M T G F S Q S P E P S P S P S K Q P F . . P K D V Y S : 169  |
| <i>Xt</i> Xin $\beta$      | GSIEEF P P P P P P N I L E T E E L A D . . F S Q S P E P P S Y A E Q Q P C A M S K E L Y A : 260    |
| <i>Tr</i> Xin $\beta$ 46   | AEDAD Y L P P P P P D L L Q M P E S E D V P A C Q D F P E P P E P L N P F K D P F N R E A F C : 323 |
| <i>Dr</i> Xin $\beta$ NA   | EEDLEY L P P P P P D L L . . E E P S D D . A E I . F P E P P L Q . . P V K H T V N R E Q H F : 139  |

**Figure 7. Multiple sequence alignment of the Mena/VASP-binding domain of the Xin proteins.** The previously identified Mena/VASP-binding domain and its immediately downstream sequence including putative DNA binding domain from aa#18–69 of hXin $\alpha$  was used to align all Xin proteins (Figure S3). Only aa#18–46 sequence of hXin $\alpha$  and its homologous sequences from some of Xin proteins are shown. The Mena/VASP binding domain (AEDLPLPPPAAEDL) only conserves in the placental mammal Xin $\alpha$  proteins. Interestingly, the sequences downstream of the Mena/VASP-binding domain are highly conserved among all mammalian Xin proteins (indicated by light blue and green boxes) including opossum Xin, however, these sequences are very divergent between Xin $\alpha$  and Xin $\beta$ , representing unidentified functional domains unique to Xin isoforms. doi:10.1371/journal.pone.0002857.g007

Xins. Although these analyses did not directly identify where or how the Xin repeat region originated, they did provide us with a clearer picture of how the regions within these proteins evolved.

Because the early diverging lamprey contains a single copy *Xin* gene and almost all other vertebrates have more than one, there should be a mechanism for the maintenance of these duplicated genes. Duplicated genes are believed to have four possible fates. The first is nonfunctionalization, whereby one gene is lost to mutation (i.e., becomes a pseudogene). The second is neofunctionalization, whereby one duplicated gene retains the ancestral function and the second gains a novel related function. The third is subfunctionalization or ‘duplication-degeneration-complementation’ whereby the original ancestral functions are partitioned between the duplicate genes. And finally duplicate genes may be maintained as multiple copies of nearly identical sequence due to positive selection for the dosage of the gene products [36–39]. It appears that duplicate Xin proteins may be retained for dosage or potentially neofunctionalization in the mammalian lineage. The significant protein divergence rate acceleration that is evident in mammalian Xin $\alpha$  is consistent with the latter view. Both mXin $\alpha$

and mXin $\beta$  however localize to the adherens junctions at the intercalated discs in the heart [5,7]. The localization at the intercalated disc is presumably through the interaction between the conserved  $\beta$ -catenin binding domain and  $\beta$ -catenin [9]. This suggests that both Xin $\alpha$  and Xin $\beta$  have a similar (i.e., but not necessarily identical) role at the intercalated discs. Interestingly, loss of *Xin $\alpha$*  in mice results in the up-regulation of the homologous *Xin $\beta$*  at both message and protein levels [5], suggesting that a particular dosage of Xin is required for proper heart development and function. This also suggests that the two proteins can partially compensate for each other because the disruption of *Xin* expression in chicken results in abnormal cardiac morphogenesis, whereas the *Xin $\alpha$* -null mouse heart still develops normally. However, defects are observed in adult *Xin $\alpha$* -null mouse heart [5] which demonstrates that Xin $\beta$  function cannot fully compensate for Xin $\alpha$  in the adult heart. Presumably, the novel and likely derived functional roles of mammalian Xin $\alpha$  reside in the derived features such as the Mena/VASP-binding domain, the proline-rich regions, and other unidentified regions that are exemplified by the rate acceleration evident in the Xin $\alpha$  repeat region. Functional





abnormal cardiac morphogenesis [1] and *mXin $\alpha$* -null mice exhibit cardiac hypertrophy, cardiomyopathy, ultrastructural defects, as well as conduction defects [5], the Xin proteins are clearly key players in heart development and maintenance. Defects in a large set of sarcomeric proteins such as cardiac  $\beta$  myosin heavy chain,  $\alpha$ -tropomyosin, titin, and cardiac  $\alpha$ -actin have been demonstrated to induce cardiac hypertrophy [40,41]. This evidence suggests that diseases like cardiac hypertrophy may indeed arise from mutations from independent genes whose proteins have coevolved for the development and/or maintenance of specific cellular or tissue structures.

## Materials and Methods

### Search for Xin repeat-containing DNA sequences and Xin ancestral proteins

Sequences for human (*Hs*, *Homo sapien*), chimpanzee (*Pt*, *Pan troglodytes*), rhesus monkey (*Mam*, *Macaca mulatta*), dog (*Cf*, *Canis familiaris*), horse (*Ec*, *Equus caballus*), cow (*Bt*, *Bos Taurus*), mouse (*Mm*, *Mus musculus*), rat (*Rn*, *Rattus norvegicus*), opossum (*Md*, *Monodelphis domestica*), chicken (*Gg*, *Gallus gallus*), green anole (*Ac*, *Anolis carolinensis*) and zebrafish (*Dr*, *Danio rerio*) were downloaded from NCBI (<http://www.ncbi.nlm.nih.gov>) using the Xin repeat region from *mXin $\alpha$*  and *cXin* as query sequences in protein BLAST searches. The sequences for western clawed frog (*Xt*, *Xenopus tropicalis*), Japanese pufferfish (*Tr*, *Takifugu rubripes*), stickleback (*Ga*, *Gasterosteus aculeatus*), Japanese medaka (*Ol*, *Oerzias latipes*) and lamprey (*Pm*, *Petromyzon marinus*) were downloaded from the e!Ensembl or Pre!Ensembl databases (<http://www.ensembl.org/index.html>) using the Xin repeat regions from *cXin* or the zebrafish Xins as query sequences in protein BLAST searches. The freshwater pufferfish (*Tn*, *Tetraodon nigroviridis*) sequences were downloaded from the Genoscope Tetraodon Genome Browser (<http://www.genoscope.cns.fr/externe/tetranew/>) using the Xin repeat regions from the zebrafish Xins as query sequences in protein BLAST searches. The green anole (*Ac*) *Xin $\alpha$*  and *Xin $\beta$* , western clawed frog (*Xt*) *Xin $\alpha$* , freshwater pufferfish (*Tn*) *Xin $\beta$* 2 and lamprey (*Pm*) *Xin* sequences were predicted from genomic contig sequences using GENSCAN (<http://genes.mit.edu/GENSCAN.html>) with the default parameters. In general, the larger Xin protein isoform sequences were used for this study, such as the characterized large *hXin $\alpha$* -A in human [10] and large *mXin $\alpha$* -a in mouse [5,9], and then the sequences were examined for consistency since many of the protein sequences are predictions from genomic DNA. For this reason, the green anole *Xin $\alpha$*  and freshwater pufferfish *Xin $\alpha$* 15 sequences were shortened at the C-terminus to be more consistent with the terrestrial *Xin $\alpha$*  and fish *Xin $\alpha$* , respectively. Most of the sequences obtained were of exceptional quality, since they were obtained from completed or nearly completed genome builds. For the sequences that were from incompleting genome builds, the obtained contig sequence regions used were sufficiently long reads that had no unresolved nucleotides. Table 1 contains a summary of the identification information, source and editing for all the sequences used in this study.

The full-length and Xin repeat region amino acid sequences of *mXin $\alpha$* , *mXin $\beta$*  as well as lamprey *Xin* were used as BLAST queries at NCBI to identify proteins with which Xin may share a common ancestry. BLASTP was used to search the mouse build protein database with the full-length Xin sequences, using no filter and an expect value = 1. Because no hits were made in the Xin repeat region, BLASTP was also used to search the mouse RefSeq protein database with the Xin repeat region sequences, using no filter and expect value = 10. Those hits with gene names were then investigated for their annotated function through database searching at the

PANTHER (Protein ANalysis THrough Evolutionary Relationships, <http://www.pantherdb.org>) classification system.

### Sequence alignment and phylogenetic reconstruction

The various Xin protein sequences were assembled in FASTA format in YooEdit V1.71 (<http://www2s.biglobe.ne.jp/~yex/YooEdit/>). Multiple sequence alignments were performed using ClustalWPPC: CLUSTAL W version 1.7 [42] software with default parameters as well as using servers at EBI Tools (<http://www.ebi.ac.uk/Tools/clustalw/index.html>) or at Pôle Bioinformatique Lyonnais (<http://npsa-pbil.ibcp.fr>). The final alignments were manually inspected and edited using the sequence alignment editor SE-AL version 1.d1 software [43]. In particular, we focused our attention on the Xin repeat alignment. Prior to the phylogenetic analysis of these data, we used ProtTest V1.3 [44] to identify the best-fit model using the Akaike Information Criterion (AIC) criterion (i.e., JTT+ $\Gamma$ +I). This model was then used in a RAxML (RAxML-VI-HPC, v2.2.1) [45] maximum likelihood analysis. This analysis used a random starting tree (one round of taxon addition) and the rapid hill-climbing algorithm (i.e., option -f d in RAxML). To generate bootstrap values, we did a RAxML bootstrap analysis (100 replicates) as described above and under PHYML (V2.4.3, [46] 200 replicates) with tree optimization using the JTT+ $\Gamma$ +I model. We used Bayesian inference (MrBayes V3.0b4, [47] with the Xin repeat alignment using the JTT+ $\Gamma$ +I model to calculate posterior probabilities for nodes in the RAxML tree. Metropolis-coupled Markov chain Monte Carlo from a random starting tree was used in this analysis with two independent runs (i.e., nrun = 2 command) and 1 cold and 3 heated chains. The Bayesian analyses were run for 600,000 generations with trees sampled every 100th generation. To increase the probability of chain convergence, we sampled trees after the standard deviation values of the two runs were <0.01 to calculate the posterior probabilities (i.e., after 94,200 generations). The remaining phylogenies were discarded as burn-in. In all of these phylogenetic analyses, the branch leading to the lamprey (*Petromyzon marinus*, *Pm Xin*) was used to root the tree. Sequences were also aligned using Clustal W with the MegAlign program within the Lasergene 6 software suite (DNASTAR, Inc., Madison, WI) and used to calculate the percent identity between two sequences. The secondary structure of the  $\beta$ -catenin-binding domains on Xins were analyzed with the software program PSIPRED (<http://bioinf.cs.ucl.ac.uk/psipred/>) [48]. The isoelectric points of the  $\beta$ -catenin binding domain and Xin repeat region for all the Xins was determined from the primary amino acid sequence using the protein characteristics feature of the Editseq program within the Lasergene 6 software suite.

### Immunofluorescence and Western blot analysis

Frozen sections of chicken, frog (*Xenopus laevis*) and zebrafish hearts were used in immunofluorescence microscopy as previously described [7]. The primary antibodies used included the rabbit polyclonal U1013 anti-*mXin* antibody [7] and mouse monoclonal anti- $\beta$ -catenin antibody (Invitrogen-Zymed, Carlsbad, CA), anti-N-cadherin (Invitrogen-Zymed), anti-plakoglobin (BD Biosciences Pharmingen, San Diego, CA) and anti-troponin T (CT3) [1] antibody. Frozen sections from two adult hearts for each organism were immunostained with a mixture of anti-*mXin* and anti- $\beta$ -catenin primary antibodies, and subsequently reacted with a mixture of rhodamine-conjugated anti-rabbit IgG and fluorescein-conjugated anti-mouse IgG secondary antibodies. The fluorescent staining was visualized using a Leica DMIRE2 microscope and imaged with a cooled CCD camera (QImaging, Burnaby, BC, Canada) and Openlab software. After immunostaining, some

**Table 1.** The DNA sequences used for analysis are listed with their respective species, GenBank accession number or other identifier, Xin isoform as well as a brief description for the nature of the sequence.

| Species                            | Accession number                    | Xin isoform      | Sequence description      |
|------------------------------------|-------------------------------------|------------------|---------------------------|
| <i>Homo sapiens (Hs)</i>           | AJ626900                            | Xin $\alpha$     | cDNA                      |
| <i>Homo sapiens</i>                | NM_152381                           | Xin $\beta$      | cDNA                      |
| <i>Pan troglodytes (Pt)</i>        | XR_025190                           | Xin $\alpha$     | Genomic DNA               |
| <i>Pan troglodytes</i>             | XR_025597                           | Xin $\beta$      | Genomic DNA               |
| <i>Macaca mulatta (Mam)</i>        | XM_001084767                        | Xin $\alpha$     | Genomic DNA               |
| <i>Macaca mulatta</i>              | XR_011865                           | Xin $\beta$      | Genomic DNA               |
| <i>Canis familiaris (Cf)</i>       | XM_846492                           | Xin $\alpha$     | Genomic DNA               |
| <i>Canis familiaris</i>            | XM_535943                           | Xin $\beta$      | Genomic DNA               |
| <i>Equus caballus (Ec)</i>         | XM_001501989                        | Xin $\alpha$     | Genomic DNA               |
| <i>Equus caballus</i>              | XM_001497011                        | Xin $\beta$      | Genomic DNA               |
| <i>Bos taurus (Bt)</i>             | XM_871103                           | Xin $\alpha$     | Genomic DNA               |
| <i>Bos taurus</i>                  | XR_027420                           | Xin $\beta$      | Genomic DNA               |
| <i>Mus musculus (Mm)</i>           | NM_00181339                         | Xin $\alpha$     | cDNA                      |
| <i>Mus musculus</i>                | AY775570-775571 and EU286528-286531 | Xin $\beta$      | cDNA                      |
| <i>Rattus norvegicus (Rn)</i>      | XM_236702                           | Xin $\alpha$     | Genomic DNA               |
| <i>Rattus norvegicus</i>           | NM_201989                           | Xin $\beta$      | cDNA                      |
| <i>Monodelphis domestica (Md)</i>  | XM_001362457                        | Xin $\alpha$     | Genomic DNA               |
| <i>Monodelphis domestica</i>       | AAFR03008876                        | Xin $\beta$      | Genomic DNA* cont3.008875 |
| <i>Gallus gallus (Gg)</i>          | AF051944                            | Xin              | cDNA                      |
| <i>Anolis carolinensis (Ac)</i>    | AAWZ01008626                        | Xin $\alpha$     | Genomic DNA** cont1.8625  |
| <i>Anolis carolinensis</i>         | AAWZ01028693                        | Xin $\beta$      | Genomic DNA* cont1.28692  |
| <i>Xenopus tropicalis (Xt)</i>     | Scaffold 28, 50–150 Kb              | Xin $\alpha$     | Genomic DNA*              |
| <i>Xenopus tropicalis</i>          | ENSXETT00000036439                  | Xin $\beta$      | Genomic DNA               |
| <i>Tetraodon nigroviridis (Tn)</i> | GSTENT00015114001                   | Xin $\alpha$ 15  | Genomic DNA <sup>+</sup>  |
| <i>Tetraodon nigroviridis</i>      | Chromosome 2                        | Xin $\beta$ 2    | Genomic DNA*              |
| <i>Tetraodon nigroviridis</i>      | GSTENT00024833001                   | Xin $\beta$ 3    | Genomic DNA               |
| <i>Takifugu rubripes (Tr)</i>      | GENSCAN00000003601                  | Xin $\alpha$ 296 | Genomic DNA               |
| <i>Takifugu rubripes</i>           | GENSCAN00000018589                  | Xin $\beta$ 36   | Genomic DNA               |
| <i>Takifugu rubripes</i>           | GENSCAN00000017305                  | Xin $\beta$ 46   | Genomic DNA               |
| <i>Gasterosteus aculeatus (Ga)</i> | ENSGACP00000016735                  | Xin $\alpha$ 3   | Genomic DNA               |
| <i>Gasterosteus aculeatus</i>      | ENSGACP00000018393                  | Xin $\beta$ 1    | Genomic DNA               |
| <i>Gasterosteus aculeatus</i>      | ENSGACP00000007099                  | Xin $\beta$ 16   | Genomic DNA               |
| <i>Oryzias latipes (Ol)</i>        | ENSORLP00000014709                  | Xin $\alpha$ 17  | Genomic DNA               |
| <i>Oryzias latipes</i>             | ENSORLP00000004267                  | Xin $\beta$ 2    | Genomic DNA               |
| <i>Oryzias latipes</i>             | chromosome 21 scaffold              | Xin $\beta$ 21   | Genomic DNA*              |
| <i>Danio rerio (Dr)</i>            | NM_001012377                        | Xin $\alpha$ 2   | cDNA                      |
| <i>Danio rerio</i>                 | XM_001343751                        | Xin $\beta$ 6    | Genomic DNA               |
| <i>Danio rerio</i>                 | XM_001332521                        | Xin $\beta$ 19   | Genomic DNA               |
| <i>Danio rerio</i>                 | XM_001337295                        | Xin $\beta$ NA   | Genomic DNA               |
| <i>Petromyzon marinus (Pm)</i>     | contig 20990, 1–14,558 bp           | Xin20990         | Genomic DNA*              |

\*indicates sequence that was annotated manually from the genomic DNA sequence with Genscan.

\*\*indicates protein sequence was manually annotated to specify consistent translational start site with other known protein sequences.

doi:10.1371/journal.pone.0002857.t001

sections were treated with 0.3% 4',6'-diamidino-2-phenylindole (DAPI; Sigma, St Louis, MO) for 15 min, washed and mounted for microscopy.

Western blot analysis of protein extracts prepared from mouse, turkey, chicken, frog (*Xenopus laevis*) and zebrafish hearts was

carried out with rabbit polyclonal U1013 anti-mXin antibody as previously described [5], except that the Odyssey Infrared Imaging System (LI-COR, Inc., Lincoln, NE) with Alexa 680-labeled secondary antibody was used for fluorescence detection of the bound primary antibody.

## Supporting Information

**Figure S1** Multiple sequence alignment of the Xin repeat region. The 31 conserved GDV(K/Q/R/S)XX(R/K/T)WLFET(Q/R/K/T)PLD Xin repeat units (XR) are individually boxed and numbered within the Xin repeat consensus sequence region for the 40 Xins.

Found at: doi:10.1371/journal.pone.0002857.s001 (0.21 MB DOC)

**Figure S2** Multiple sequence alignment of the beta-catenin binding domain of Xin proteins. Located within the conserved Xin repeat region, the beta-catenin binding domain previously characterized from aa#535–636 of mXinalpha was used to identify the homologous region in other Xin proteins and aligned with CLUSTAL W. The positions of the 17th–19th Xin repeat units (XR17–XR19) are highlighted above the aligned sequences. Identical residues are highlighted in black with white letters, conserved residues are highlighted in dark grey with white letters, and similar residues are highlighted in light grey with black letters. Found at: doi:10.1371/journal.pone.0002857.s002 (0.05 MB DOC)

**Figure S3** Multiple sequence alignment of the Mena/VASP-binding domain and putative DNA-binding domain sequences. The Mena/VASP-binding domain (EDLPLPPPPALED) was previously mapped to aa#18–46 of hXinalpha and two acidic residues each at the N- and C-termini were essential for its binding activity. Based on this characteristic, the Mena/VASP-binding domain is a derived trait found only in the placental mammal Xin $\alpha$  lineage that seems to have arisen from a deletion within the terrestrial Xin $\alpha$  N-terminal proline-rich region. Meanwhile, the putative DNA-binding domain (#47–69 of mXinalpha) identified by the high similarity with the Myb-A and Myb-B DNA-binding domains [1] appears to be an ancestral trait that is highly conserved in most Xin proteins, except Xt Xinalpha28, Tn Xinbeta2, Tn Xinbeta3 and Tr Xinbeta36. Identical residues are highlighted in black with white letters, conserved residues are highlighted in dark grey with white letters, and similar residues are highlighted in light grey with black letters.

Found at: doi:10.1371/journal.pone.0002857.s003 (0.05 MB DOC)

**Figure S4** Multiple sequence alignment of the C-terminal region immediately downstream of the Xin repeat region. The entire C-terminal region of the Xin proteins (sequence immediately after the Xin repeats) was aligned to identify regions of high conservation. From this alignment, the sequence region containing aa#743–1,083 of mXinalpha and aa#1,307–1,705 of mXinbeta and their homologous regions from all Xins revealed a high conservation among all the Xin $\beta$  proteins and the putative ancestral Pm Xin. There is a high degree of similarity in this region among mammalian Xinalpha proteins, which is much divergent from the same region of all Xinbeta proteins. Interestingly, there is a G(D/N)(V/I/L) motif repeated 10 and

13 times within the conserved C-terminus of all Xin $\beta$  proteins and the teleost Xin $\beta$  respectively (indicated by \* below the alignment). Unexpectedly, this G(D/N)(V/I/L) motif is very similar to the first three amino acids of the Xin repeat unit.

Found at: doi:10.1371/journal.pone.0002857.s004 (0.22 MB DOC)

**Figure S5** Multiple sequence alignment of the C-terminal proline-rich regions of the Xins. The amino acid residues from #1,245 to 1,334 of mXinalpha and from #1,961 to 2,069 of mXinbeta are highly enriched in proline and then defined as the C-terminal proline-rich regions. Although both Xinalphas and Xinbetas contain this C-terminal proline-rich sequence, the two regions are highly divergent. (A) Sequence alignment of the C-terminal proline-rich region of Xinalphas. A high sequence homology was observed among all mammalian Xinalphas. (B) Sequence alignment of the C-terminal proline-rich region of Xinbetas. A high sequence homology was observed among all mammalian Xinbetas. The conserved proline residues are indicated with a star (\*) at the bottom of the alignments.

Found at: doi:10.1371/journal.pone.0002857.s005 (0.09 MB DOC)

**Figure S6** Multiple sequence alignment of the filamin c-binding region of Xinalpha. The filamin c-binding region was previously mapped to the last 158 amino acid residues (aa#1,685–1,843) of one of spliced variant from hXinalpha gene [10], which is the largest but minor Xinalpha in the human heart, equivalent to mXinalpha-a isoform in the mouse heart. Although the major isoform from hXinalpha and mXinalpha did not contain this filamin c-binding region, we have recently shown by yeast 2-hybrid assay that mXinalpha is able to interact with a more ubiquitous isoform of filamin, filamin b. An alignment of all Xins putative filamin c-binding region did not result in overall conservation (alignment not shown). However, the strongest identity to each other was observed throughout the entire filamin c-binding region of all mammal Xinalphas. Thus, the filamin c-binding region appears to be a derived trait in the mammal Xinalpha.

Found at: doi:10.1371/journal.pone.0002857.s006 (0.05 MB DOC)

## Acknowledgments

We would like to thank Diane Slusarski and Douglas Houston for providing us zebrafish and frog hearts, respectively, that were used for Western blot analysis and immunofluorescence microscopy. We also thank Sunju Choi for helpful information on phylogenetic analysis.

## Author Contributions

Conceived and designed the experiments: SEG QW JJCL. Performed the experiments: SEG DB QW. Analyzed the data: SEG DB QW JJCL. Contributed reagents/materials/analysis tools: DB. Wrote the paper: SEG DB JJCL.

## References

1. Wang D-Z, Reiter RS, Lin JL-C, Wang Q, Williams HS, et al. (1999) Requirement of a novel gene, *Xin*, in cardiac morphogenesis. *Development* 126: 1281–1294.
2. Wang D-Z, Hu X, Lin JL-C, Kitten GT, Solorsh M, et al. (1996) Differential display of mRNAs from the atrioventricular region of developing chicken hearts at stages 15 and 21. *Front Biosci* 1: 1–15.
3. Lin JJ-C, Gustafson-Wagner EA, Sinn HW, Choi S, Jaacks SM, et al. (2005) Structure, expression and function of a novel intercalated disc protein, Xin. *J Med Sci* 25: 215–222.
4. Huang H-T, Brand OM, Mathew M, Ignatiou C, Ewen EP, et al. (2006) Myomaxin is a novel transcriptional target of MEF2A that encodes a Xin-related  $\alpha$ -Actinin-interacting protein. *J Biol Chem* 281: 39370–39379.
5. Gustafson-Wagner EA, Sinn HW, Chen Y-L, Wang D-Z, Reiter RS, et al. (2007) Loss of mXin $\alpha$ , an intercalated disc protein, results in cardiac hypertrophy and cardiomyopathy with conduction defects. *Am J Physiol Heart Circ Physiol* 293: H2680–H2692.
6. Pacholsky D, Vakeel P, Himmel M, Lowe T, Stradal T, et al. (2004) Xin repeats define a novel actin-binding motif. *J Cell Sci* 117: 5257–5268.



7. Sinn HW, Balsamo J, Lilien J, Lin JJ-C (2002) Localization of the novel Xin protein to the adherens junction complex in cardiac and skeletal muscle during development. *Dev Dyn* 225: 1–13.
8. Cherepanov O, Orlova A, Galkin VE, van der Ven PFM, Furst DO, et al. (2006) Xin-repeats and nebulin-like repeats bind to F-actin in a similar manner. *J Mol Biol* 356: 714–723.
9. Choi S, Gustafson-Wagner EA, Wang Q, Harlan SM, Sinn HW, et al. (2007) The intercalated disc protein, mXin $\alpha$ , is capable of interacting with  $\beta$ -catenin and bundling actin filaments. *J Biol Chem* 282: 36024–26036.
10. van der Ven PFM, Ehler E, Vakeel P, Eulitz S, Schenk JA, et al. (2006) Unusual splicing events result in distinct Xin isoforms that associate differentially with filamin c and Mena/VASP. *Exp Cell Res* 312: 2154–2167.
11. Vandepoel K, De Vos W, Taylor JS, Meyer A, Van de Peer Y (2004) Major events in the genome evolution of vertebrates: paranome age and size differs considerably between ray-finned fishes and land vertebrates. *Proc Natl Acad Sci U S A* 101: 1638–1643.
12. Tamura K, Dudley J, Nei M, Kumar S (2007) MEGA4: Molecular evolutionary genetics analysis (MEGA) software version 4.0. *Mol Biol Evol* 24: 1596–1599.
13. Blomme T, Vandepoel K, De Bodt S, Simillion C, Maere S, et al. (2006) The gain and loss of genes during 600 million years of vertebrate evolution. *Genome Biol* 7: R43.
14. Panopoulou G, Poustka AJ (2005) Timing and mechanism of ancient vertebrate genome duplications - the adventure of a hypothesis. *Trends Genet* 21: 559–567.
15. Escriva H, Manzon L, Youson J, Laudet V (2002) Analysis of lamprey and hagfish genes reveals a complex history of gene duplications during early vertebrate evolution. *Mol Biol Evol* 19: 1440–1450.
16. Jaillon O, Aury JM, Brunet F, Petit JL, Stange-Thomann N, et al. (2004) Genome duplication in the teleost fish *Tetraodon nigroviridis* reveals the early vertebrate proto-karyotype. *Nature* 431: 946–957.
17. Postlethwait JH, Woods IG, Ngo-Hazelett P, Yan Y-L, Kelly PD, et al. (2000) Zebrafish comparative genomics and the origins of vertebrate chromosomes. *Genome Res* 10: 1890–1902.
18. Hillier LW, Miller W, Birney E, Warren W, Hardison RC, et al. (2004) Sequence and comparative analysis of the chicken genome provide unique perspectives on vertebrate evolution. *Nature* 432: 695–716.
19. Choi HJ, Weis WI (2005) Structure of the armadillo repeat domain of plakophilin 1. *J Mol Biol* 346: 367–376.
20. Huber AH, Weis WI (2001) The structure of the beta-catenin/E-cadherin complex and the molecular basis of diverse ligand recognition by beta-catenin. *Cell* 105: 391–402.
21. Thoreson MA, Anastasiadis PZ, Daniel JM, Ireton RC, Wheelock MJ, et al. (2000) Selective uncoupling of p120(ctn) from E-cadherin disrupts strong adhesion. *J Cell Biol* 148: 189–202.
22. Polakis P (1997) The adenomatous polyposis coli (APC) tumor suppressor. *Biochim Biophys Acta* 1332: F127–147.
23. Hurley IA, Mueller RL, Dunn KA, Schmidt EJ, Friedman M, et al. (2007) A new time-scale for ray-finned fish evolution. *Proc Biol Sci* 274: 489–498.
24. Nakatani Y, Takeda H, Kohara Y, Morishita S (2007) Reconstruction of the vertebrate ancestral genome reveals dynamic genome reorganization in early vertebrates. *Genome Res* 17: 1254–1265.
25. Kreibel ME (1970) Wave front analyses of impulses in tunicate heart. *Am J Physiol* 218: 1194–1200.
26. Randall DJ, Davie PS (1980) The hearts of urochordates and cephalochordates. In: Bourne GH, ed. *Hearts and Heart-like Organs*. New York: Academic Press Inc. pp 41–59.
27. Moller PC, Philpott CW (1973) The circulatory system of amphioxus (*Branchiostoma floridae*). *J Morphol* 139: 389–406.
28. Rahr H (1981) The ultrastructure of the blood vessels of *Branchiostoma lanceolatum* (Palla) (Cephalochordata). *Zoomorphology* 97: 53–74.
29. Percy R, Potter IC (1991) Aspects of the development and functional morphology of the pericardia, heart and associated blood vessels of lampreys. *J Zool* 223: 49–66.
30. Kilarsky W (1964) The organization of the cardiac muscle cell of the lamprey (*Petromyzon marinus* L.). *Acta Biol Crac Ser Zoo* 7: 75–87.
31. Hu N, Sedmera D, Yost HJ, Clark EB (2000) Structure and function of the developing zebrafish heart. *Anat Rec* 260: 148–157.
32. Burnstock G (1969) Evolution of the autonomic innervation of visceral and cardiovascular systems in vertebrates. *Pharmacol Rev* 21: 247–324.
33. Augustinsson KB, Fänge R, Johnels A, Ostlund E (1956) Histological, physiological and biochemical studies on the heart of two cyclostomes, hagfish (Myxine) and lamprey (Lampetra). *J Physiol* 131: 257–276.
34. Nakao T, Suzuki S, Saito M (1981) An electron microscopic study of the cardiac innervation in larval lamprey. *Anat Rec* 199: 555–563.
35. Moorman AFM, Christoffels VM (2003) Cardiac chamber formation: development, genes, and evolution. *Physiol Rev* 83: 1223–1267.
36. Ohno S (1973) Ancient linkage groups and frozen accidents. *Nature* 244: 259–262.
37. Stoltzfus A (1999) On the possibility of constructive neutral evolution. *J Mol Evol* 49: 169–181.
38. Nowak MA, Boerlijst MC, Cooke J, Smith M (1997) Evolution of genetic redundancy. *Nature* 388: 167–170.
39. Walsh JB (1995) How often do duplicated genes evolve new functions? *Genetics* 110: 345–364.
40. Marian AJ, Roberts R (2001) The molecular genetic basis for hypertrophic cardiomyopathy. *J Mol Cell Cardiol* 33: 655–670.
41. Towbin JA (2000) Molecular genetics of hypertrophic cardiomyopathy. *Curr Cardiol Rep* 2: 134–140.
42. Thompson JD, Higgins DG, Gibson TJ (1994) CLUSTAL W: improving the sensitivity of progressive multiple sequence alignments through sequence weighting, position-specific gap penalties and weight matrix choice. *Nucleic Acids Res* 22: 4673–4680.
43. Rambaut A (1995) SE-AL sequence alignment program. Version 1.D1. Department of Zoology, University of Oxford, Oxford, England.
44. Abascal F, Zardoya R, Posada D (2005) ProtTest: selection of best-fit models of protein evolution. *Bioinformatics* 21: 2104–2105.
45. Stamatakis A, Ludwig T, Meier H (2005) RAXML-III: a fast program for maximum likelihood-based inference of large phylogenetic trees. *Bioinformatics* 21: 456–463.
46. Guindon S, Gascuel O (2003) A simple, fast, and accurate algorithm to estimate large phylogenies by maximum likelihood. *Syst Biol* 52: 696–704.
47. Huelsenbeck JP, Ronquist F (2001) MRBAYES: Bayesian inference of phylogenetic trees. *Bioinformatics* 17: 754–755.
48. McGuffin LJ, Bryson K, Jones DT (2000) The PSIPRED protein structure prediction server. *Bioinformatics* 16: 404–405.
